# Supplementary material for: Mobile Ecological Momentary Diet Assessment Methods for Behavioral Research: Systematic Review
Source: PubMed Central journal article supplement (PMC6280032; doi:10.2196/11170), 2018-11-20
Supplement: mhealth_v6i11e11170_app1.pdf [file mhealth_v6i11e11170_app1.pdf]

## **Multimedia Appendix 1. Data Extraction List**

- First Author
- Year
- Title
- Study name
- Goal of Research
- Population(s) studied
- Mobile device
- Operating System
- Training paradigm
- Duration of sampling
- Sampling contingency (event, signal, etc.)
- Frequency of sampling
- Prompt notification (if applicable)
- Prompt Scheduling (Prompt frequency and times, if applicable)
- Data collection timing (Real time or retrospective)
- Data entry restrictions and reminders
- Valid response rate (compliance, if applicable)
- Diet data (source)
- Diet data collection (response format)
- Dietary variable source
- Level of diet data output
- Diet data output (units)
- Concurrent data collected
- Additional details provided in:
-
